# Supplementary material for: Identification of tRNA-Derived Small RNAs and their Potential Roles in the Hippocampus of Nicotine Exposure Rats
Source: Research Square preprint supplement (doi:10.21203/rs.3.rs-152478/v1), 2021-01-26
Supplement: Supplementary file 1 [file ca289e69581612318a740e6e.docx]

**Table S1.** Sequences of primers used for RT-qPCR assay

| **Gene name** | **Primer sequence** | **Ta Opt (℃)** | **Product size (bp)** |
| --- | --- | --- | --- |
| U6 | F:5’GCTTCGGCAGCACATATACTAAAAT3’  R:5’CGCTTCACGAATTTGCGTGTCAT3’ | 60 | 89 |
| tRF-3a-Lys-CTT-1-M3 | F:5’ AGTCCGACGATCCCCCAC 3'  R:5’ TGTGCTCTTCCGATCTTGGC 3’ | 60 | 45 |
| tRF-1-T16-Cys-GCA-5-20 | F:5’ GTCCGACGATCGTGCACTCT 3'  R:5’ CGTGTGCTCTTCCGATCTAAAAT 3’ | 60 | 45 |
| tRF-1-T28-His-GTG-1 | F:5’ TCCGACGATCGTGTAGTACTTCT 3'  R:5’ CGATCTAAAAGATGGCCAGG 3’ | 60 | 44 |
| tRF-5c-Pro-AGG-1-M4 | F:5’ ACGATCGGCTCGTTGGTCTA 3'  R:5’ TCCGATCTAGCGAGAATCATACC 3’ | 60 | 45 |
| tRF-5c-Glu-CTC-3 | F:5’ TCTCCCTGGTGGTCTAGTGGT 3'  R:5’ GCTCTTCCGATCTTGAATCCT 3’ | 60 | 43 |
| tRF-5c-Glu-TTC-4 | F:5’ AGTCCGACGATCTCCCACAT 3'  R:5’ TCCGATCTCAGGAATCCTAACC 3’ | 60 | 50 |
| tRF-5c-Glu-CTC-1 | F:5’ TCCGACGATCTCCCTGGTG 3'  R:5’ TCTCGCCGAATCCTAACCACT 3’ | 60 | 44 |
| tRF-5c-Gly-GCC-2-M2 | F:5’ GATCGCATGGGTGGTTCAGT 3'  R:5’ GCTCTTCCGATCTAGGCGAG 3’ | 60 | 49 |
